# Supplementary material for: Distinction of electron pathways at titanium oxide/liquid interfaces in photocatalytic processes and co-catalyst effects
Source: Royal Society of Chemistry journal article supplement (doi:10.1039/c6cp04016k), 2016-01-01
Supplement: c6cp04016k1.pdf [file c6cp04016k1.pdf]

## 1 **Distinction of electron pathways at titanium oxide / liquid** 2 **interfaces in photocatalic processes and co-catalyst effect**

3 **Shota Kuwahara, and Kenji Katayama**

4

5 **Electronic Supplementary Information (ESI):**

6

7 **Examples of the fitting curves for the heterodyne transient grating (HD-TG) responses**  
8 **obtained by the MEM analyses (Figure S1)**

9 Time constant distributions were obtained by the MEM analyses in the time range of  $10^{-7}$  to  $10^{-5}$  s.  
10 In this MEM analysis, the response was assumed by a sum of exponential functions with discrete  
11 time constants. The entropy of the error between the function and data is maximized under the  
12 constraints; the dispersion of the error is set at the actually measurement error, and the normalization  
13 of the pre-exponential factors. The data point was reduced to 2000 points from the original data to  
14 reduce the calculation time for the MEM analyses. The fitting curves were obtained from the sum of  
15 the exponential functions with the time constants obtained by the MEM analysis. The oscillation  
16 responses corresponding due to the acoustic grating in  $10^{-7} - 10^{-6}$  s was neglected for the fitting.

17

18 **Phase dependence of the HD-TG responses and the transient absorption response for a TiO<sub>2</sub>**  
19 **thin film in ethanol (Figure S2)**

20 The heterodyne transient grating (HD-TG) responses were obtained by the setup described in the  
21 experimental section. The transient absorption (TA) measurement was measured at the same probe  
22 wavelength, 532 nm just by removing a plate of the transmission grating used for the HD-TG  
23 measurement. Since the sample is excited with a grating pattern in the HD-TG technique, diffusive  
24 processes such as thermal diffusion, diffusion of carriers or chemical species, also cause the decay of  
25 the response by diffusing out the refractive index pattern. By checking the grating spacing  
26 dependence, it can be confirmed if the decay is induced by the diffusion processes or the intrinsic  
27 decay due to the lifetime for carriers or intermediate species. The grating dependence was shown in  
28 Figure 2S. Only the thermal part in the responses showed the grating dependence and the other parts  
29 did not depend on it.

30 In principle, the heterodyne signal intensity is expressed as follows:

$$31 \quad I(t) = I_{\text{ref}} + ((\Delta n(t))^2 + (\Delta k(t))^2) I_{\text{pr}} + 2E_{\text{ref}}E_{\text{pr}}(\Delta n(t) \times \cos(\phi + \phi_0) + \Delta k(t) \times \sin(\phi + \phi_0))$$

32 where  $I_{\text{ref}}$  and  $I_{\text{pr}}$  represent the intensities of the reference and probe, respectively;  $E_{\text{ref}}$  and  $E_{\text{pr}}$   
33 represent the electric field of the reference and probe, respectively;  $\phi$ , the phase difference between

1 the signal and the reference.  $\phi_0$  is the initial phase difference and  $\phi$  is given by  $\phi = (2\pi / \lambda_{pr}) \Delta l$ ,  
2 where  $\Delta l$  is the optical path difference between the signal and reference fields. By changing the  
3 distance between a sample and the transmission grating, the phase  $\phi$  can be continuously changed,  
4 and when it is changed by  $\pi$ , the HD-TG response is reversed in sign. By adjusting  $\phi + \phi_0 = n\pi$ ,  
5 the refractive index change is selectively observed, and the corresponding HD-TG response is shown  
6 in figure S2 (80  $\mu\text{m}$  (+)), and also the response after changing  $\phi + \phi_0$  by  $\pi$  is shown in figure S2 (80  
7  $\mu\text{m}$  (-)). The phase shift was confirmed by the thermal response of a reference sample. (20 mM  
8 nitrobenzene /cyclohexane) Only the responses after  $10^{-3}$  s did not have the phase dependence, and  
9 remained a positive signal. The responses after  $10^{-3}$  s were compared with the response of the  
10 transient absorption at the same wavelength, which is shown on the same graph. The TA response  
11 almost overlapped with those of the HD-TG responses. It was confirmed that the response after  $10^{-3}$   
12 s was due to the absorption change in the  $\text{TiO}_2$  thin film by the UV photoirradiation.

13

14

1

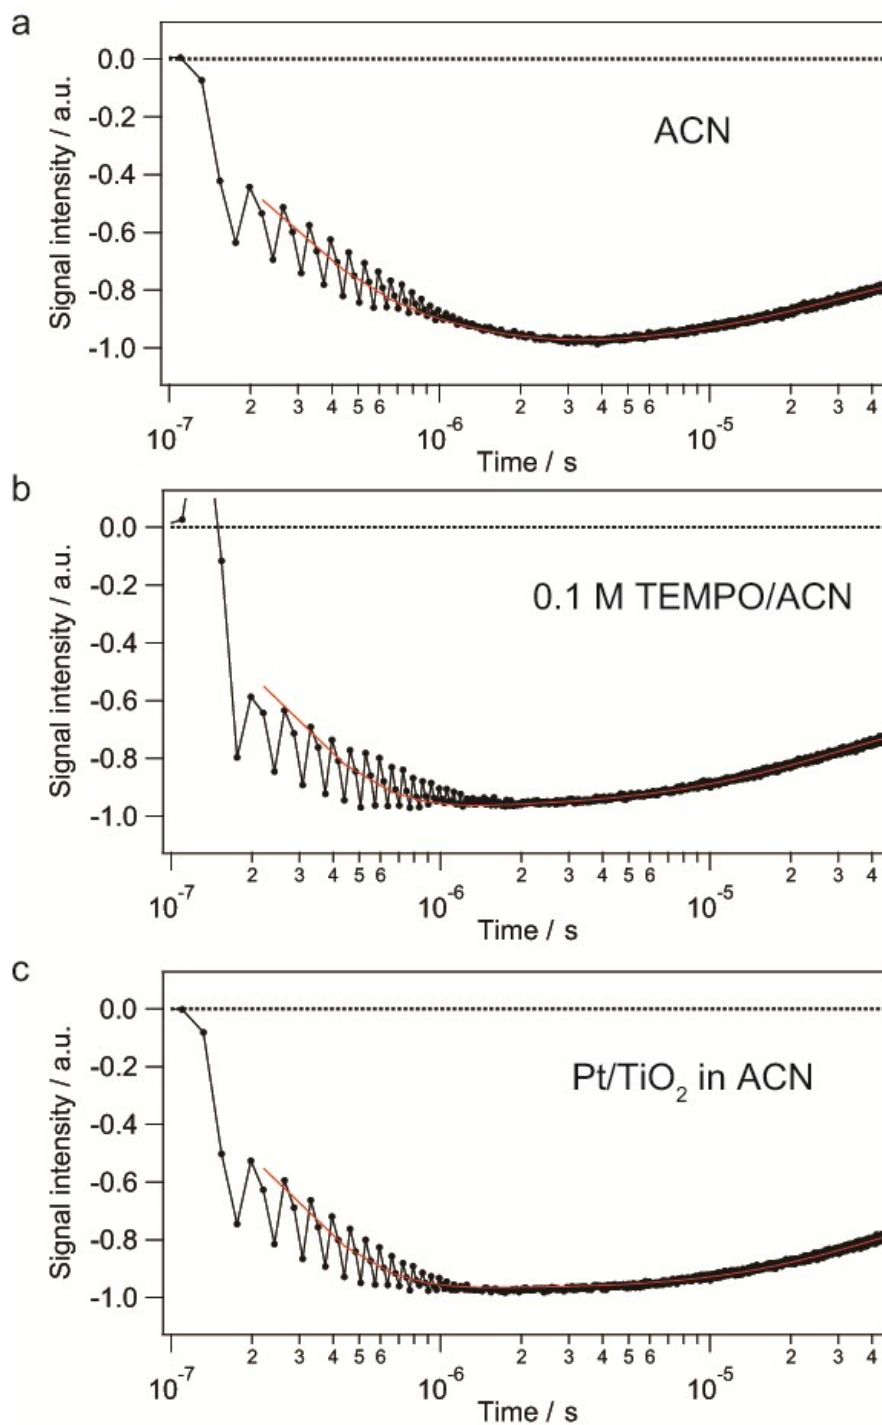

2

3 **Figure S1.** The HD-TG responses (black solid line with circles) and the corresponding fitted curves  
4 (red line) obtained by the MEM/NLS analyses for (a) a TiO<sub>2</sub> thin film in acetonitrile and (b) a TiO<sub>2</sub>  
5 thin film in 0.1 M TEMPO/acetonitrile, and (c) a Pt/TiO<sub>2</sub> thin film in acetonitrile. The oscillation  
6 responses corresponding due to the acoustic grating was neglected for the fitting.

1

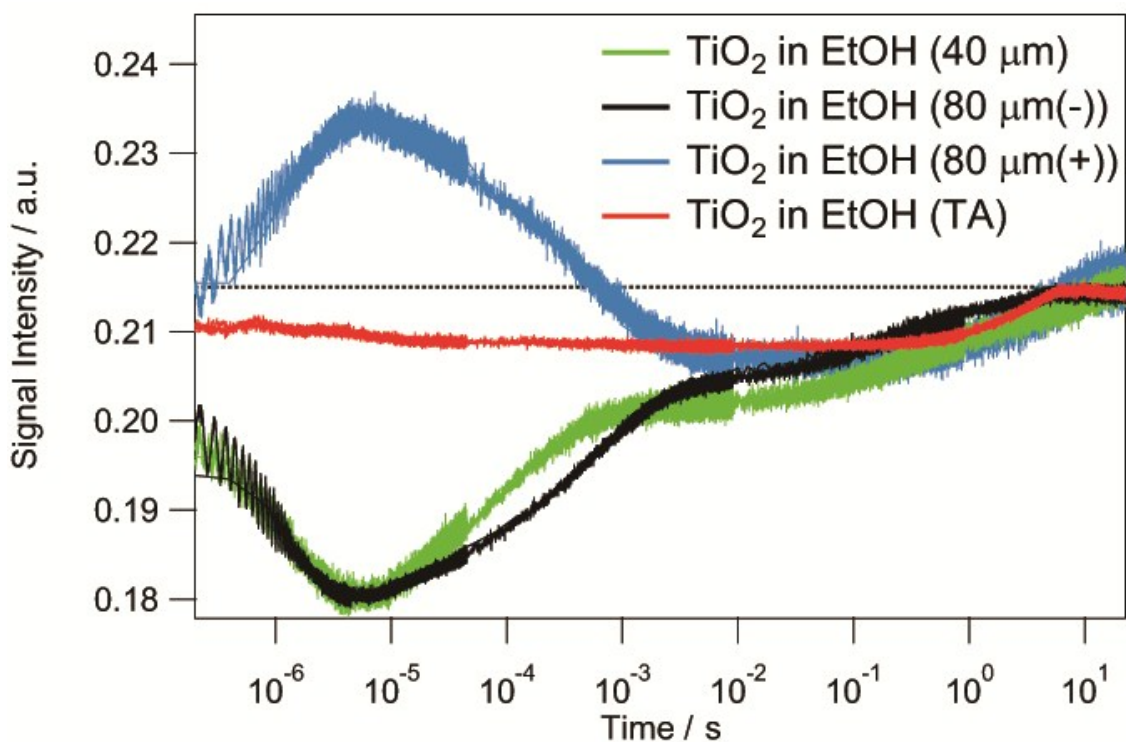

2

3 **Figure S2.** The HD-TG and TA responses for a TiO<sub>2</sub> thin film in ethanol. The HD-TG responses  
4 were obtained with the grating spacing ( $\Lambda$ ) of 80 μm (black) and 40 μm (green). The response after  
5 changing the phase for the heterodyne detection by  $\pi$  for the grating spacing of 80 μm is also shown  
6 (blue). The horizontal black dashed line shows the background level for these measurements.

7
